# Supplementary material for: Amicoumacin A induces cancer cell death by targeting the eukaryotic ribosome
Source: PubMed Central journal article supplement (PMC4906347; doi:10.1038/srep27720), 2016-06-14
Supplement: srep27720-s1.pdf [file srep27720-s1.pdf]

## Amicoumacin A induces cancer cells death by targeting the eukaryotic ribosome

*Irina V. Prokhorova, Kseniya A. Akulich, Desislava S. Makeeva, Ilya A. Osterman, Dmitry A. Skvortsov, Petr V. Sergiev, Olga A. Dontsova, Gulnara Yusupova, Marat M. Yusupov, Sergey E. Dmitriev*

### SUPPLEMENTARY FIGURES

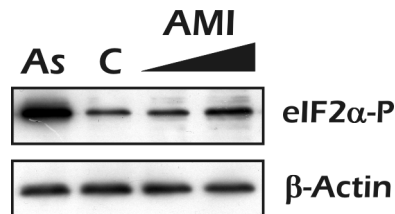

**Supplementary Figure 1. Induction of eIF2 phosphorylation in HEK293T cells by amicoumacin A.** C – untreated cells; As – 2 h incubation with 200  $\mu$ M sodium arsenite; AMI – 2 h incubation with 1  $\mu$ M or 5  $\mu$ M amicoumacin A.

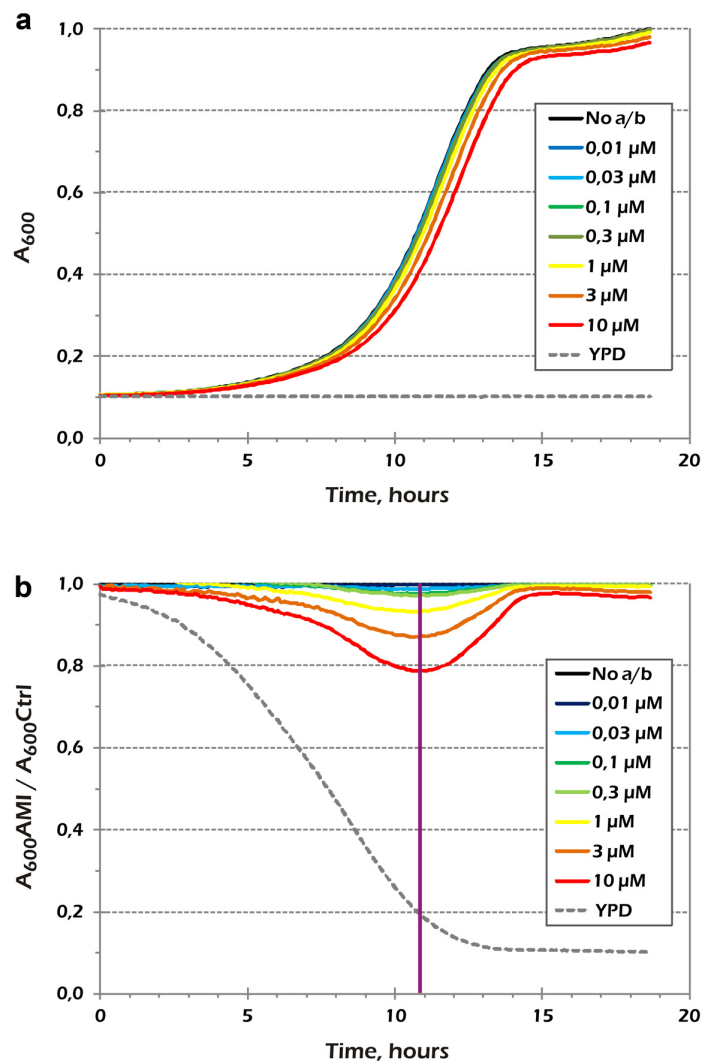

**Supplementary Figure 2. Yeast culture growth curves.** Yeast cells were grown in a microplate reader (in 24-well plate) at 30 °C with continuous shaking with or without amicoumacin A. (a) OD600 values measured every 5 min are shown. (b) The ratios of the OD600 values in amicoumacin A containing wells and antibiotic-free ones were calculated.

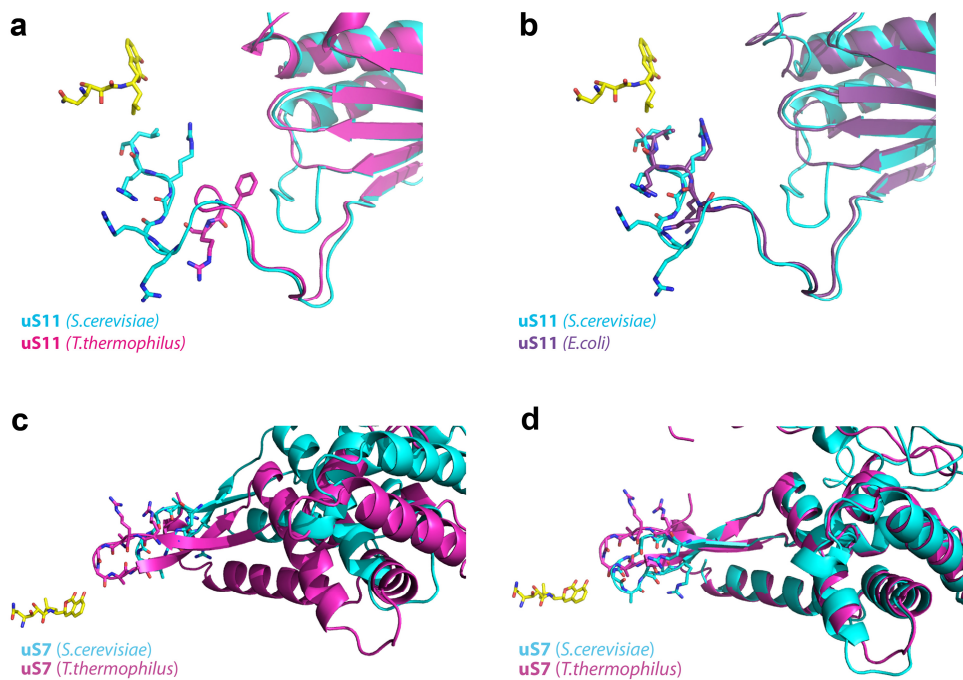

**Supplementary Figure 3. Interactions of uS11 and uS7 proteins in eukaryotic and bacterial ribosome with amicoumacin A.** The antibiotic is shown in yellow. (a-c) Structures of 80S and 70S ribosomes were aligned based on the helix 23 in 18S or 16S rRNA. (a) Yeast uS11 protein is shown in blue, uS11 from *T.thermophilus* is shown in pink (PDB entry 4W2F), and other ribosomal components are omitted for clarity. (b) Yeast uS11 protein is shown in blue, and uS11 from the structure of *E.coli* ribosome is shown in violet (PDB entry 4YBB). (c) Yeast uS7 is shown in blue, and uS7 from *T.thermophilus* is shown in pink (PDB entry 4W2F). (d) Alignment of the structure of uS7 protein from yeast ribosome on the structure of uS7 in bacterial ribosome. Amicoumacin A is shown in yellow, yeast uS7 is shown in blue, uS7 from *T.thermophilus* is shown in pink (PDB entry 4W2F), and other ribosomal components are omitted for clarity.

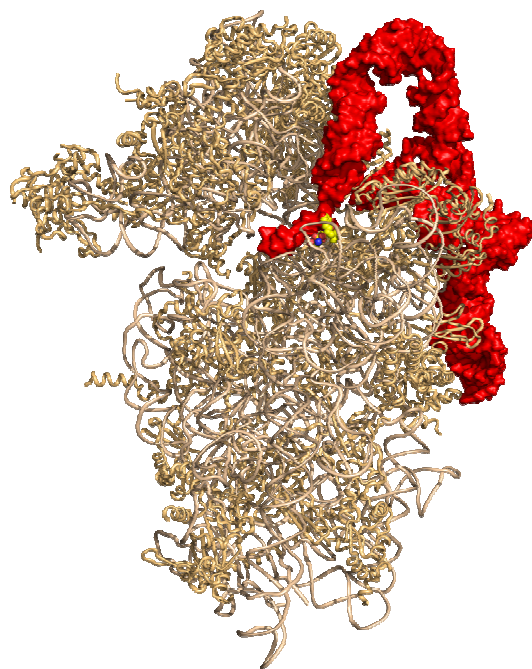

**Supplementary Figure 4. Alignment of the structure of yeast 40S ribosomal subunit in complex with amicoumacin A and the structure of human 40S subunit in complex with HCV IRES (PDB entry 5A2G).** Yeast 40S subunit is shown in wheat, amicoumacin A in yellow, HCV IRES in red, and the human 40S subunit is omitted for clarity.
